# Supplementary material
Source: Springer Nature journal article supplement (https://www.springermedizin.de/resource/supplementary/12935_2011_320_MOESM11_ESM.pdf/9540326)

|                   |   |   |   |   |   |   |   |   |
|-------------------|---|---|---|---|---|---|---|---|
| Plasmid V5-SRD5A1 | + | + | + | + | + | + | + | - |
| siRNA             | 1 | - | 2 | - | 3 | - | - | - |
| mm                | - | 1 | - | 2 | - | 3 | - | - |

25 kDa

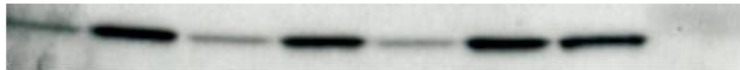

V5-SRD5A1

37 kDa

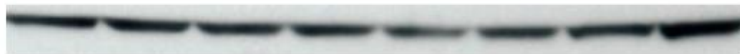

GAPDH

Lane                    1                    2                    3                    4                    5                    6                    7                    8

Supplement: MOESM11 [file 9540326]
